# Supplementary material
Source: HighWire-hosted journal article supplement (http://thorax.bmjjournals.com/highwire/filestream/174232/field_highwire_adjunct_files/1/Thorax_Figure_129320.pdf)
Supplement: Thorax_Figure_129320.pdf [file Thorax_Figure_129320.pdf]

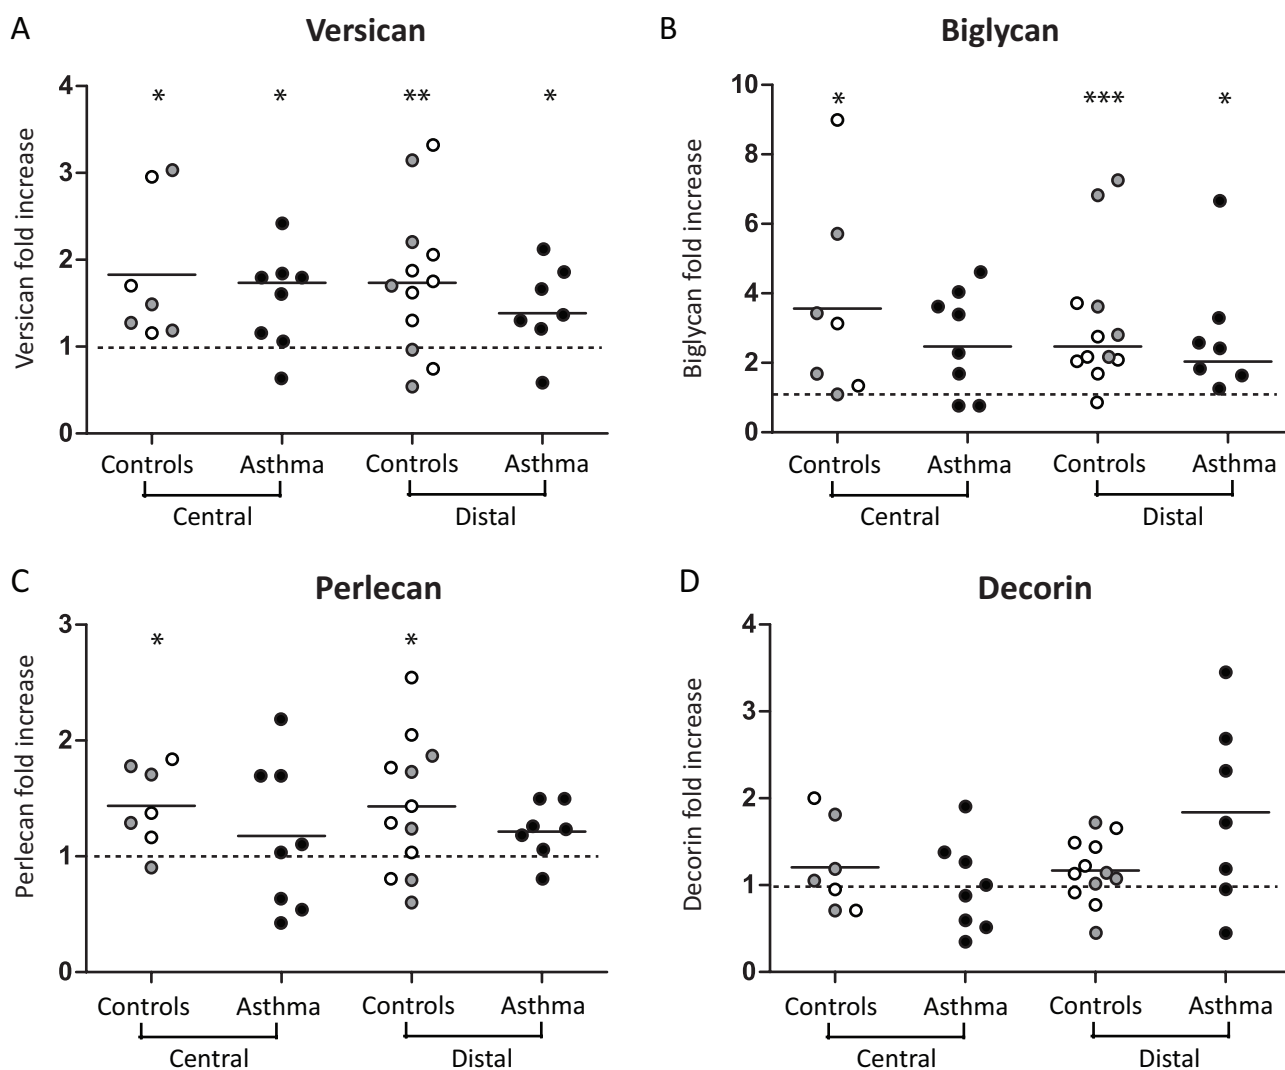

#### TGF- $\beta$ 1-induced proteoglycan production in centrally-derived and distally-derived fibroblasts.

Primary fibroblasts were incubated with 10ng/ml TGF- $\beta$ 1 for 24 hours to evaluate the effects of the individual proteoglycans A) versican, B) biglycan, C) perlecan, and D) decorin. The cells were harvested and analyzed for proteoglycan production as described in Material and Methods. Data are presented as fold increase over non-stimulated cells (0.4% serum). Open circles represent non-atopic controls and grey circles represent atopic controls (○ and ●, respectively). Filled circles represent asthma subjects (●). Wilcoxon signed rank test was used to calculate the significance of increased production vs. non-stimulated cells (0.4%). Values of  $p < 0.05$  were regarded as significant.
